# Supplementary material for: PI3K class II α regulates δ-opioid receptor export from the trans-Golgi network
Source: PubMed Central journal article supplement — Mol Biol Cell. 2017 Aug 1;28(16):2202–19. doi: 10.1091/mbc.E17-01-0030 (PMC5531736; doi:10.1091/mbc.e17-01-0030), 2017-08-01
Supplement: supp_E17-01-0030v1_CombinedSupMats.pdf [file supp_E17-01-0030v1_CombinedSupMats.pdf]

# Supplemental Materials

*Molecular Biology of the Cell*

Shiwarski et al.

## Supplemental Figures:

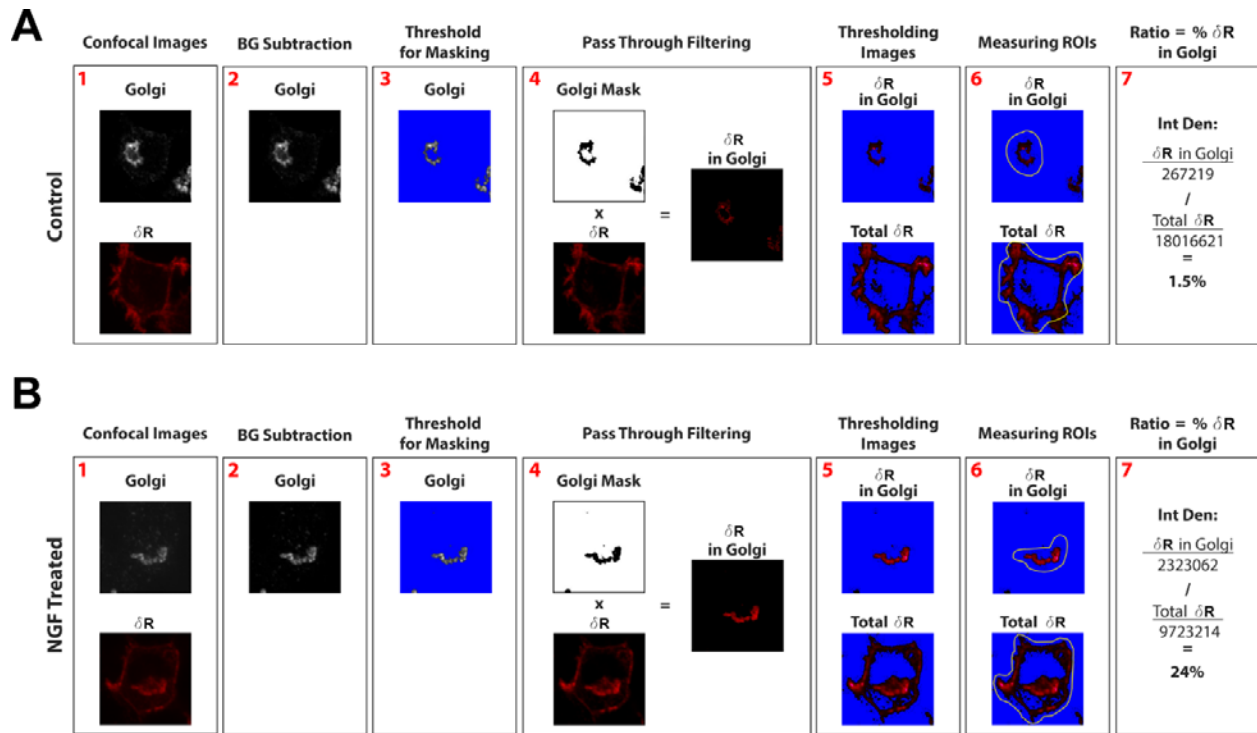

**Figure S1: Analysis of  $\delta R$  retention using quantitative fluorescent imaging.** **A.** Depicted is the analysis method we developed for the fixed-cell quantification of the % of  $\delta R$  within the Golgi compared to the total cell fluorescence. 1) Confocal images of fluorescently labeled  $\delta R$  and the Golgi marker (TGN-38) were acquired. 2) The background fluorescence was subtracted from the Golgi channel. 3) The Golgi channel was thresholded to construct a mask of the Golgi region. 4) The Golgi mask was used as a pass-through filter by converting the Golgi mask to a binary image and multiplying it by the  $\delta R$  image. This allows for the measurement of the amount of  $\delta R$  fluorescence within the Golgi region. 5) The  $\delta R$  within the Golgi and total  $\delta R$  images were thresholded to remove bias from background zero pixels. 6) Regions of interest (ROIs) were drawn for the Golgi region and the total  $\delta R$  signal. Measurements were then made in ImageJ to calculate the total fluorescence within these two regions. 7) The fluorescence signal for  $\delta R$  within the Golgi was then divided by the total  $\delta R$  fluorescence signal to get a ratio of the % of  $\delta R$  within the Golgi compared to the total expression of  $\delta R$ . An example is shown for this analysis and calculation for a control treated cell where there is little to no Golgi  $\delta R$ , and an NGF treated cell where there is an apparent Golgi pool of  $\delta R$ .

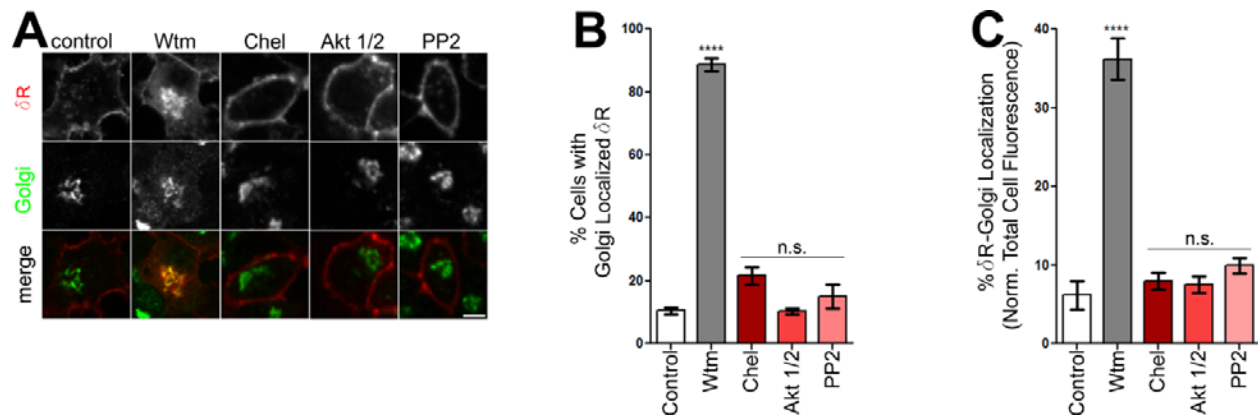

**Figure S2: Inhibition of downstream PI3K targets are not sufficient to induce intracellular retention of  $\delta R$ .** **A.** Example images (of  $n = 3$  independent experiments) for PC12 cells expressing FLAG-tagged  $\delta R$  treated with inhibitors of PKC by Chelerythrine (Chel, 10  $\mu M$ ), Akt by Akt1/2 Kinase Inhibitor (Akt1/2, 500 nM), and cSrc by PP2 (500 nM). PI3K inhibition by Wortmannin (Wtm, 10  $\mu M$ ) was used as a positive control. **B-C.** Unlike Wtm, inhibition of PI3K downstream targets PKC, Akt, and cSrc do not cause a significant increase in the % of cells with intracellular  $\delta R$ , nor the % of total  $\delta R$  fluorescence localized to the Golgi compared to control (Control,  $n=69$  cells; Wtm,  $n=60$  cells; Chel,  $n=74$  cells; Akt 1/2,  $n=69$  cells; PP2,  $n=79$  cells; mean  $\pm$  s.e.m.; \*\*\*\* $P < 0.0001$ , n.s. = not significant ( $P > 0.05$ ); by two-sided t-test vs. Control).

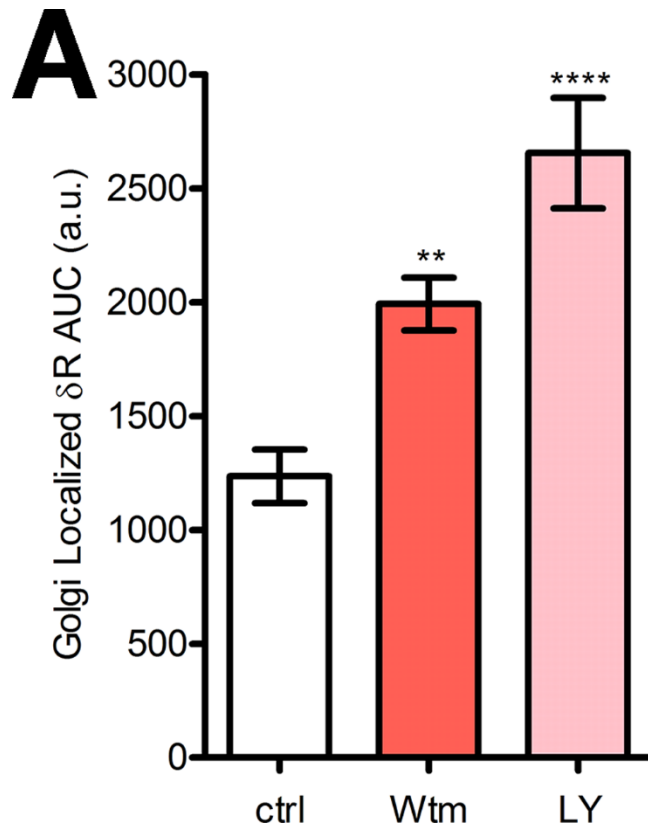

**Figure S3: PI3K-inhibition delays the export of  $\delta R$  from the Golgi. A.** Area under the curve analysis of the VSVG- $\delta R$ tail-GFP experiments revealed that PI3K inhibition by Wortmannin (Wtm, 10  $\mu M$ ) and LY294002 (LY, 10  $\mu M$ ) significantly increased the total Golgi-localized signal (control,  $n=12$  cells; Wortmannin,  $n=14$  cells; LY294002,  $n=12$  cells; mean  $\pm$  s.e.m.; \*\* $P<0.01$ ; \*\*\*\* $P<0.0001$ ; by two-sided t-test vs. ctrl).

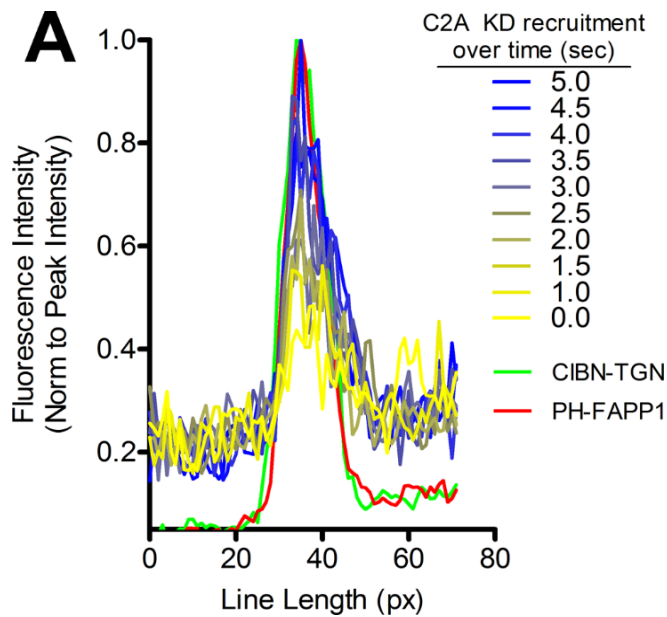

**Figure S4: mCherry-CRY2-PI3K-C2A-KD is recruited to the TGN in a time-dependent manner following optogenetic stimulation. A.** Over time, the fluorescence intensity profile of the C2A KD along the line scan analysis shows increasing fluorescence intensity (Yellow to Blue), and the peak fluorescence intensity, and the fluorescence intensity distribution for C2A KD (Red), co-align with CIBN-TGN (Green), and PH-FAPP1 (Blue) after 5 seconds of optical stimulation.

**Supplemental Table 1:**

Table of sequences ordered and 22mer targets

| shRNA 22_mer Sequence |                         | Adapter Pairs                                                                                                                                                                                                                                                                                                 |
|-----------------------|-------------------------|---------------------------------------------------------------------------------------------------------------------------------------------------------------------------------------------------------------------------------------------------------------------------------------------------------------|
| #1                    | GCCACACCATTTTCATCCACAAG | 5'- TCGAGTGCTGTTGACAGTGAGCG <b>ACCACACCATTTTCATCCACAAG</b> TAGTGAAGC - 3'<br>3'-CACGACAAC <b>TGTC</b> ACTCGCT <b>GGTGTGGTAAAGTAGGGTTC</b> ATCACTTCGGTGT-5'<br>5'- CACAGATGT <b>ACTTGTGGATGAAATGGTGTGGC</b> TGCCTACTGCCTCGGAG - 3'<br>3'- TACAT <b>GAACACCTACTTTACCACACCG</b> ACGGATGACGGAGCCTCTTAA - 5'       |
| #2                    | GAAGGTTGGCACATACAAGAAT  | 5'- TCGAGTGCTGTTGACAGTGAGCG <b>AAAGGTTGGCACATACAAGAAT</b> TAGTGAAGC - 3'<br>3'- CACGACAAC <b>TGTC</b> ACTCGCT <b>TTCCAACCGTGTATGTTCTTA</b> ATCACTTCGGTGTGTC - 5'<br>5'- CACAGATGT <b>AATCCTTGTATGTGCCAACCTTC</b> TGCCTACTGCCTCGGAG - 3'<br>3'- TACAT <b>AAGAACAATACACGGTTGGAAG</b> ACGGATGACGGAGCCTCTTAA - 5' |
| #3                    | AAAGATATTGCTGGATGACAAT  | 5'- TCGAGTGCTGTTGACAGTGAGCG <b>CAAGATATTGCTGGATGACAAT</b> TAGTGAAGC - 3'<br>3'- CACGACAAC <b>TGTC</b> ACTCGC <b>GTTCTATAACGACCTACTGTTA</b> ATCACTTCGGTGTGTC - 5'<br>5'- CACAGATGT <b>AATTGTCATCCAGCAATATCTTTT</b> GCCACTGCCTCGGAG - 3'<br>3'- TACAT <b>TAACAGTAGGTCGTTATAGAAA</b> ACGGATGACGGAGCCTCTTAA - 5'  |
| #4                    | TCCAGTCACAGTGCAAAGAAAC  | 5'- TCGAGTGCTGTTGACAGTGAGCG <b>CCCAGTCACAGTGCAAAGAAAC</b> TAGTGAAGC - 3'<br>3'- CACGACAAC <b>TGTC</b> ACTCGC <b>GGGTCAGTGTACGTTTCTTTG</b> ATCACTTCGGTGTGTC - 5'<br>5'- CACAGATGT <b>AGTTTCTTTGCACTGTGACTGGATGC</b> CTACTGCCTCGGAG - 3'<br>3'- TACAT <b>CAAGAAACGTGACACTGACCT</b> ACGGATGACGGAGCCTCTTAA - 5'   |
| #5                    | AGCCTACAACCTTGATAAGAAAG | 5'- TCGAGTGCTGTTGACAGTGAGCG <b>CGCCTACAACCTTGATAAGAAAG</b> TAGTGAAGC - 3'<br>3'- CACGACAAC <b>TGTC</b> ACTCGC <b>CGGATGTTGAACTATTCTTT</b> CATCACTTCGGTGTGTC - 5'<br>5'- CACAGATGT <b>ACTTTCTTATCAAGTTGTAGGCTTGC</b> CTACTGCCTCGGAG - 3'<br>3'- TACAT <b>GAAGAATAGTTCAACATCCGA</b> ACGGATGACGGAGCCTCTTAA - 5'  |
